# Supplementary material for: Oral Complications Associated with the Piercing of Oral and Perioral Tissues and the Corresponding Degree of Awareness among Public and Professionals: A Systematic Review
Source: MDPI journal article supplement (doi:10.3390/diagnostics13213371), 2023-11-02
Supplement: s1 [file s1]

**Supplementary Table S1.** An example of the search strategy used for the databases search.

|                        |                                                                                                                                                                                                                                                                                                                                                                                                                                                                                                    |
|------------------------|----------------------------------------------------------------------------------------------------------------------------------------------------------------------------------------------------------------------------------------------------------------------------------------------------------------------------------------------------------------------------------------------------------------------------------------------------------------------------------------------------|
| <b>Search Strategy</b> | {[<piercing* OR pierce*> AND <mouth OR oral OR lip* OR labret* OR cheek* OR bucca* OR tongue OR lingua* OR frenulum* OR philtrum* OR uvul* OR venom OR tooth OR gingiva* OR gum* OR mucos*>] OR [(mouth piercing*) OR (oral piercing) OR (lip piercing) OR (cheek piercing) OR (buccal piercing*) OR (tongue piercing) OR (lingual piercing*) OR (frenulum piercing) OR (uvula piercing) OR (venom piercing) OR (tooth piercing*) OR (gingiva piercing) OR (gums piercing) OR (mucosa piercing)]}. |
|------------------------|----------------------------------------------------------------------------------------------------------------------------------------------------------------------------------------------------------------------------------------------------------------------------------------------------------------------------------------------------------------------------------------------------------------------------------------------------------------------------------------------------|
